# Supplementary material for: Effects of Resveratrol on Muscle Inflammation, Energy Utilisation, and Exercise Performance in an Eccentric Contraction Exercise Mouse Model
Source: MDPI journal article supplement (doi:10.3390/nu15010249), 2023-01-03
Supplement: s1 [file s1]

**Table S1. Gene ontology enrichment table of EX vs. EX+RES150 – biological process, molecular function & cellular component**

**(A) Gene Ontology enrichment table - Biological Process (BP)**

| ID         | Description                                                                               | Count | GcncRatio | BgRatio   | pvalue | qvalue |
|------------|-------------------------------------------------------------------------------------------|-------|-----------|-----------|--------|--------|
| GO:0002504 | antigen processing and presentation of peptide or polysaccharide antigen via MHC class II | 11    | 11/360    | 26/29008  | 0      | 0e+00  |
| GO:0002495 | antigen processing and presentation of peptide antigen via MHC class II                   | 10    | 10/360    | 24/29008  | 0      | 0e+00  |
| GO:0002478 | antigen processing and presentation of exogenous peptide antigen                          | 11    | 11/360    | 33/29008  | 0      | 0e+00  |
| GO:0019884 | antigen processing and presentation of exogenous antigen                                  | 11    | 11/360    | 40/29008  | 0      | 0e+00  |
| GO:0007159 | leukocyte cell-cell adhesion                                                              | 26    | 26/360    | 373/29008 | 0      | 0e+00  |
| GO:0048002 | antigen processing and presentation of peptide antigen                                    | 13    | 13/360    | 78/29008  | 0      | 0e+00  |
| GO:0002819 | regulation of adaptive immune response                                                    | 20    | 20/360    | 236/29008 | 0      | 0e+00  |
| GO:0019886 | antigen processing and presentation of exogenous peptide antigen via MHC class II         | 8     | 8/360     | 20/29008  | 0      | 0e+00  |
| GO:0022407 | regulation of cell-cell adhesion                                                          | 26    | 26/360    | 457/29008 | 0      | 0e+00  |
| GO:0002697 | regulation of immune effector process                                                     | 25    | 25/360    | 424/29008 | 0      | 0e+00  |
| GO:1903555 | regulation of tumor necrosis factor superfamily cytokine production                       | 17    | 17/360    | 186/29008 | 0      | 0e+00  |
| GO:1903039 | positive regulation of leukocyte cell-cell adhesion                                       | 19    | 19/360    | 240/29008 | 0      | 0e+00  |

|                                                                  |    |        |           |   |       |
|------------------------------------------------------------------|----|--------|-----------|---|-------|
| GO:0001819 positive regulation of cytokine production            | 27 | 27/360 | 500/29008 | 0 | 0e+00 |
| GO:1903037 regulation of leukocyte cell-cell adhesion            | 22 | 22/360 | 333/29008 | 0 | 0e+00 |
| GO:0045785 positive regulation of cell adhesion                  | 26 | 26/360 | 471/29008 | 0 | 1e-07 |
| GO:0071706 tumor necrosis factor superfamily cytokine production | 17 | 17/360 | 191/29008 | 0 | 1e-07 |
| GO:0019882 antigen processing and presentation                   | 14 | 14/360 | 126/29008 | 0 | 1e-07 |
| GO:1903131 mononuclear cell differentiation                      | 26 | 26/360 | 489/29008 | 0 | 1e-07 |
| GO:0022409 positive regulation of cell-cell adhesion             | 20 | 20/360 | 288/29008 | 0 | 1e-07 |
| GO:0001818 negative regulation of cytokine production            | 20 | 20/360 | 292/29008 | 0 | 1e-07 |

(B) Gene Ontology enrichment table - Molecular Function (MF)

| ID         | Description                                                         | Count | GeneRatio | BgRatio   | pvalue    | qvalue    |
|------------|---------------------------------------------------------------------|-------|-----------|-----------|-----------|-----------|
| GO:0023026 | MHC class II protein complex binding                                | 6     | 6/355     | 13/28438  | 0.0000000 | 0.0000026 |
| GO:0140375 | immune receptor activity                                            | 13    | 13/355    | 136/28438 | 0.0000000 | 0.0000039 |
| GO:0023023 | MHC protein complex binding                                         | 6     | 6/355     | 23/28438  | 0.0000003 | 0.0000460 |
| GO:0019955 | cytokine binding                                                    | 11    | 11/355    | 139/28438 | 0.0000015 | 0.0001666 |
| GO:0004896 | cytokine receptor activity                                          | 9     | 9/355     | 97/28438  | 0.0000036 | 0.0003263 |
| GO:0061629 | RNA polymerase II-specific DNA-binding transcription factor binding | 16    | 16/355    | 329/28438 | 0.0000045 | 0.0003401 |
| GO:0140297 | DNA-binding transcription factor binding                            | 18    | 18/355    | 431/28438 | 0.0000095 | 0.0006136 |
| GO:0005096 | GTPase activator activity                                           | 17    | 17/355    | 405/28438 | 0.0000158 | 0.0008888 |

|            |                                                           |    |        |           |           |           |
|------------|-----------------------------------------------------------|----|--------|-----------|-----------|-----------|
| GO:0030695 | GTPase regulator activity                                 | 17 | 17/355 | 421/28438 | 0.0000258 | 0.0011629 |
| GO:0060589 | nucleoside-triphosphatase regulator activity              | 17 | 17/355 | 421/28438 | 0.0000258 | 0.0011629 |
| GO:0019957 | C-C chemokine binding                                     | 4  | 4/355  | 25/28438  | 0.0002455 | 0.0100532 |
| GO:0001848 | complement binding                                        | 4  | 4/355  | 26/28438  | 0.0002872 | 0.0107843 |
| GO:0045028 | G protein-coupled purinergic nucleotide receptor activity | 3  | 3/355  | 12/28438  | 0.0003903 | 0.0135264 |
| GO:0016922 | nuclear receptor binding                                  | 8  | 8/355  | 155/28438 | 0.0007649 | 0.0246156 |
| GO:0019956 | chemokine binding                                         | 4  | 4/355  | 34/28438  | 0.0008237 | 0.0247403 |
| GO:0031490 | chromatin DNA binding                                     | 6  | 6/355  | 97/28438  | 0.0013818 | 0.0345668 |
| GO:0042826 | histone deacetylase binding                               | 7  | 7/355  | 132/28438 | 0.0013843 | 0.0345668 |
| GO:0003779 | actin binding                                             | 14 | 14/355 | 444/28438 | 0.0015169 | 0.0345668 |
| GO:0001614 | purinergic nucleotide receptor activity                   | 3  | 3/355  | 19/28438  | 0.0016112 | 0.0345668 |
| GO:0001846 | opsonin binding                                           | 3  | 3/355  | 19/28438  | 0.0016112 | 0.0345668 |

(C) Gene Ontology enrichment table - Cellular Component (CC)

| ID         | Description                  | Count | GeneRatio | BgRatio   | pvalue    | qvalue    |
|------------|------------------------------|-------|-----------|-----------|-----------|-----------|
| GO:0042613 | MHC class II protein complex | 6     | 6/361     | 12/28886  | 0.0000000 | 0.0000008 |
| GO:0045121 | membrane raft                | 19    | 19/361    | 392/28886 | 0.0000006 | 0.0000526 |
| GO:0098857 | membrane microdomain         | 19    | 19/361    | 393/28886 | 0.0000006 | 0.0000526 |
| GO:0005925 | focal adhesion               | 12    | 12/361    | 169/28886 | 0.0000016 | 0.0000969 |

|            |                                         |    |        |           |           |           |
|------------|-----------------------------------------|----|--------|-----------|-----------|-----------|
| GO:0005681 | spliceosomal complex                    | 13 | 13/361 | 206/28886 | 0.0000022 | 0.0001075 |
| GO:0030055 | cell-substrate junction                 | 12 | 12/361 | 181/28886 | 0.0000033 | 0.0001323 |
| GO:0043235 | receptor complex                        | 18 | 18/361 | 408/28886 | 0.0000046 | 0.0001604 |
| GO:0042611 | MHC protein complex                     | 6  | 6/361  | 38/28886  | 0.0000072 | 0.0002198 |
| GO:0030532 | small nuclear ribonucleoprotein complex | 7  | 7/361  | 66/28886  | 0.0000186 | 0.0005040 |
| GO:0071004 | U2-type prespliceosome                  | 4  | 4/361  | 15/28886  | 0.0000294 | 0.0006520 |
| GO:0071010 | prespliceosome                          | 4  | 4/361  | 15/28886  | 0.0000294 | 0.0006520 |
| GO:0120114 | Sm-like protein family complex          | 7  | 7/361  | 78/28886  | 0.0000554 | 0.0010891 |
| GO:0005765 | lysosomal membrane                      | 10 | 10/361 | 171/28886 | 0.0000624 | 0.0010891 |
| GO:0098852 | lytic vacuole membrane                  | 10 | 10/361 | 171/28886 | 0.0000624 | 0.0010891 |
| GO:0097525 | spliceosomal snRNP complex              | 6  | 6/361  | 58/28886  | 0.0000855 | 0.0013928 |
| GO:0005795 | Golgi stack                             | 7  | 7/361  | 86/28886  | 0.0001035 | 0.0015802 |
| GO:0031985 | Golgi cisterna                          | 6  | 6/361  | 61/28886  | 0.0001137 | 0.0016337 |
| GO:0005774 | vacuolar membrane                       | 11 | 11/361 | 228/28886 | 0.0001521 | 0.0020641 |
| GO:0005684 | U2-type spliceosomal complex            | 7  | 7/361  | 95/28886  | 0.0001935 | 0.0024867 |
| GO:0032432 | actin filament bundle                   | 7  | 7/361  | 97/28886  | 0.0002202 | 0.0026885 |

---
